# Supplementary material for: Pre-treatment with the CDK4/6 inhibitor palbociclib improves the efficacy of paclitaxel in TNBC cells
Source: PubMed Central journal article supplement (PMC6736958; doi:10.1038/s41598-019-49484-4), 2019-09-10
Supplement: 41598_2019_49484_MOESM1_ESM.pdf [file 41598_2019_49484_MOESM1_ESM.pdf]

**Pre-treatment with the CDK4/6 inhibitor palbociclib improves the efficacy of paclitaxel in TNBC cells**

Daniele Cretella<sup>+</sup>, Claudia Fumarola<sup>+</sup>, Mara Bonelli<sup>\*</sup>, Roberta Alfieri, Silvia La Monica, Graziana Digiaco, Andrea Cavazzoni, Maricla Galetti, Daniele Generali, Pier Giorgio Petronini.

\*Correspondence to:

Mara Bonelli - Department of Medicine and Surgery, University of Parma, Italy

Tel +39 0521 903766

E mail mara.bonelli@unipr.it

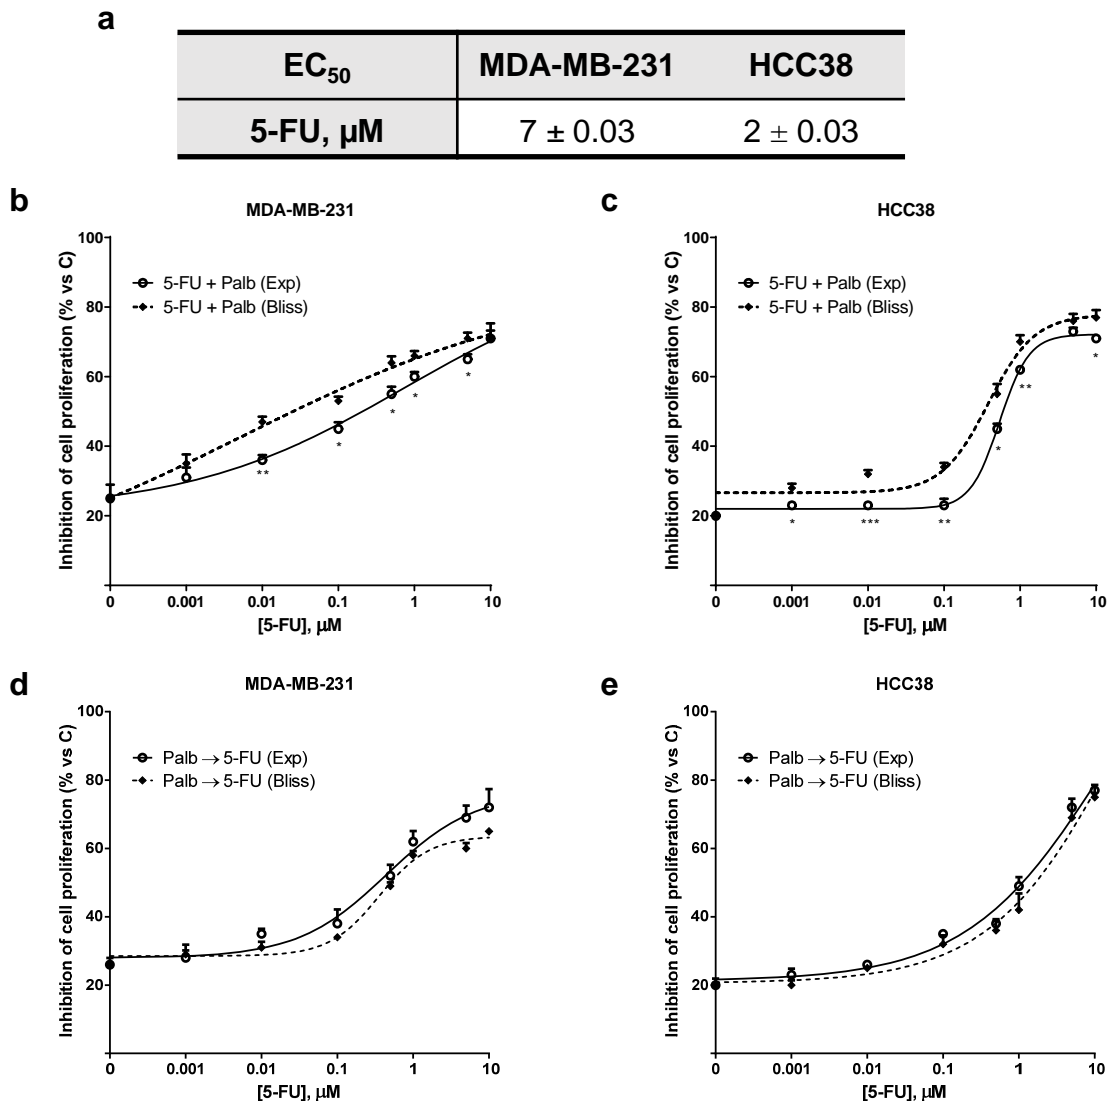

**Supplementary Fig.1** Palbociclib combined with 5-FU induces different effects on cell proliferation depending on the treatment schedule

**a** MDA-MB-231 and HCC38 cells were treated with increasing concentrations of 5-FU. After 72h cell proliferation was evaluated by CV staining. Data are expressed as EC<sub>50</sub> values and are means  $\pm$ SD of three independent experiments. MDA-MB-231 and HCC38 cells were treated with 0.5  $\mu\text{M}$  palbociclib alone or in combination with increasing concentrations of 5-FU (**b**, **c**) or with 0.5  $\mu\text{M}$  palbociclib for 24h followed by exposure to increasing concentrations of 5-FU alone for 48h (**d**, **e**). After 72h cell proliferation was assessed by CV assay. The effect of the drug combinations was evaluated using the Bliss interaction model. Data are mean values  $\pm$ SD of three independent experiments.
